# Supplementary material
Source: publisher site journal article supplement (https://www.dovepress.com/article/425978)
Supplement: Supplementary file 1 [file get_supplementary_file.php]

Table S1. The sequences of the individual primers used in the experiment.

| Gene                            | Gene ID | Sequence                                                            |
|---------------------------------|---------|---------------------------------------------------------------------|
| <i>YWHAZ</i>                    | 7534    | F: 5'-TGTAGGAGCCCGTAGGTCATC-3'<br>R: 5'-GTGAAGCATTGGGGATCAAGA-3'    |
| <i>IL-4R<math>\alpha</math></i> | 3565    | F: 5'-CTGCTCATGGATGACGTGGTCA-3'<br>R: 5'-GGTGTGAACTGTCAGGTTTCCTG-3' |
| <i>H4R</i>                      | 5934    | F: 5'-ACTCTGATGGTGGCCGTTT-3'<br>R: 5'-TCAGTCCAGGATGGCTTTG-3'        |
| <i>TRPV1</i>                    | 7442    | F: 5'-CACGACATGCTCTTGGTGGGA-3'<br>R: 5'-TCCATCTTAAAGGGAGGCAAGC-3'   |
| <i>TRPV4</i>                    | 59341   | F: 5'-CCCGTGAGAACACCAAGTTT-3'<br>R: 5'-TCACTCCAGGGCATTCTTC-3'       |
| <i>TRPM8</i>                    | 79054   | F: 5'-TGCCATCTCCTACGCTCTA-3'<br>R: 5'-TTCGCAACCAGTTTCCAG-3'         |
